# Supplementary material
Source: HighWire-hosted journal article supplement (https://jnm.snmjournals.org/highwire/filestream/93962/field_highwire_adjunct_files/0/jnm057943_SUPPLEMENTAL_FIGURE_1.pdf)
Supplement: jnm057943_SUPPLEMENTAL_FIGURE_1.pdf [file jnm057943_SUPPLEMENTAL_FIGURE_1.pdf]

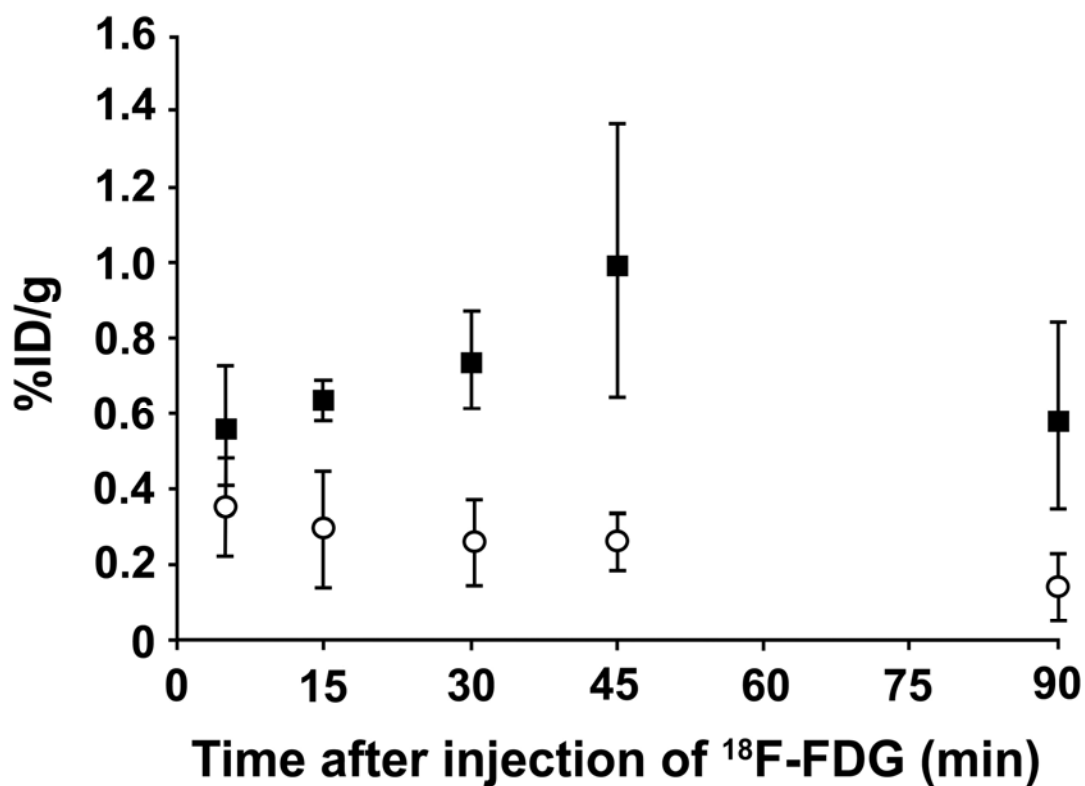

**SUPPLEMENTAL FIGURE 1.**  $^{18}\text{F}$ -FDG accumulation in small intestine at time points after  $^{18}\text{F}$ -FDG injection in indomethacin-administered (■) or vehicle-administered (○) rats at 1 d after administration.  $^{18}\text{F}$ -FDG accumulation was evaluated by  $\gamma$ -counting study. Data are shown as mean  $\pm$  SD;  $n = 4\text{--}8$  animals.
